# Freshwater diatoms diversify faster than marine in both planktonic and benthic habitats

Teofil Nakov<sup>1,\*</sup>, Jeremy M. Beaulieu<sup>1</sup>, Andrew J. Alverson<sup>1</sup>

<sup>1</sup> Department of Biological Sciences, University of Arkansas Fayetteville, <sup>1</sup> University of Arkansas, SCEN 601, Fayetteville, AR 72701

\*Corresponding author: [tnakov@uark.edu](mailto:tnakov@uark.edu)

## Abstract

The marine–freshwater divide is a key determinant of the distribution and diversity of aquatic organisms. Many clades that span the salinity gradient are disproportionately more diverse in the younger, short-lived, and less abundant freshwater environments than they are in the marine realm, which covers most of the biosphere. Differences in the rates of accumulation and loss of diversity between marine and freshwaters contribute to these diversity imbalances. Assessing the salinity gradient together with other potential interacting variables can provide important additional insights. Diatoms, a species-rich lineage of photosynthetic protists, display a striking diversity imbalance across the marine–freshwater divide, but also between planktonic and benthic habitats, making them an excellent system to study such interactions. We used a novel set of state speciation and extinction models to show that the salinity–habitat interaction was important for diatom diversification and that both planktonic and benthic lineages turnover faster in freshwaters. Lineages occupying the same habitat (e.g., marine plankton) can diversify at substantially different rates in relation to the cumulative effect of unobserved variables implicitly accounted for by our models. Traversals of the salinity gradient were bidirectional, rejecting longstanding hypotheses about the permeability of the salinity barrier. The probability of colonization of freshwater (and the plankton) does, however, vary across the diatom phylogeny, indicating that phylogenetic diversity differs substantially between habitats (e.g., marine vs. freshwater plankton). Unlike metazoans, diatoms both speciate and go extinct at a faster rate in freshwater, suggesting an association between the rates of lineage and habitat turnover.

## Introduction

Freshwater habitats comprise only about 2% of the biosphere, yet in lineages that span the salinity gradient the magnitude of freshwater diversity is often comparable, or surpasses, species richness in the marine realm, which covers 70% of Earth’s surface (Appeltans et al., 2012; Grosberg et al., 2012; Miller & Wiens, 2017; Mora et al., 2011; Wiens, 2015). This is striking given that most such lineages originated in the oceans, and so—all else equal—have had more time to accumulate diversity within their ancestral marine environment. Disconnects between species richness and time for accumulation of diversity are found across animals [e.g., flatworms, rotifers, molluscs, and ray-finned fish (Guinot & Cavin, 2015; Miller & Wiens, 2017; Wiens, 2015)] and specific tests about diversification across the salinity divide have revealed that in amniotes, for example, marine lineages have higher extinction rates (Miller & Wiens 2017, but see Vermeij et al. 2018), and in fish, freshwater lineages diversify faster (Bloom et al., 2013). Overall, however, in animals there is not a clear consensus about the underlying mechanisms (Miller & Wiens, 2017; Vermeij et al., 2018), whereas plants and fungi have little to offer to the topic because they are so depauperate in marine systems (Appeltans et al., 2012; Mora et al., 2011). Microbes, including protists, could help advance our understanding of diversification across the marine–freshwater divide: they are diverse at both ends of the salinity gradient (Appeltans et al., 2012; Mora

et al., 2011) and offer alternative perspectives due to their vastly different dispersal capabilities, population sizes, and physiological features compared to animals. Moreover, studies of other groups have yet to consider that the focal contrast (marine vs. freshwater) is almost certainly not the sole determinant of diversification dynamics, but rather, these patterns are likely the product of many potentially interacting aspects of the habitats and traits of different lineages (Beaulieu & O'Meara, 2016). Added layers of complexity might come, for example, from latitudinal diversity gradients (Powell & Glazier, 2017) or subdivisions of marine and freshwater ecosystems into planktonic (suspended) and benthic (substrate-associated) habitats (Signor & Vermeij, 1994), which have long been recognized as important for the distribution and diversity of aquatic biota.

Our knowledge of microbial diversity lags far behind the extensive, and in many cases, near-complete, species catalogs of macro-organisms (Appeltans et al., 2012; Larsen et al., 2017; Mora et al., 2011). Despite this, patterns of imbalanced species richness across environmental gradients, including the marine–freshwater and plankton–benthos divides, are well known in bacteria, protists, and zooplankton (Hart et al., 2003; Logares et al., 2009; Lozupone & Knight, 2007; Rigby, 1997). In foraminifera and many zooplankton groups, planktonic lineages are often derived and appear to have originated through one or a few rare colonizations by benthic ancestors, followed by *in situ* diversification in the plankton (Darling et al., 2009; Hart et al., 2003; Rigby, 1997; Rigby & Milsom, 1996; Signor & Vermeij, 1994). Reversals to the benthos occur rarely, if ever at all (Rigby & Milsom, 1996). Similarly, most aquatic lineages are thought to be ancestrally marine and to have colonized freshwaters infrequently (Cavalier-Smith, 2009; Lee & Bell, 1999; Logares et al., 2009, 2007; Lozupone & Knight, 2007). Such transitions are considered challenging, as migrants need to mitigate osmotic stress linked to changes in cellular water potential, salt stress caused by increased uptake or loss of ions, and changes in the ratios of intracellular ions (Kirst, 1990, 1996). As a result, freshwater colonizations among protists are generally considered rare and phylogenetically deep events with broad evolutionary consequences (Cavalier-Smith, 2009; Logares et al., 2009; Mann, 1999).

Diatoms are a species-rich lineage of eukaryotic algae that play important roles in the global cycling of carbon and oxygen and form the base of many aquatic food webs (Armbrust, 2009; Bowler et al., 2010). Diatoms span the marine–freshwater and plankton–benthos divides, though few data have been brought to bear on characterizing the directions, patterns, and consequences of transitions across these and other major environmental gradients. The history of plankton–benthos transitions in diatoms is just beginning to be resolved. Transitions between habitats are infrequent relative to changes between colonial and solitary growth forms, and colonial species are more likely to colonize the plankton (Nakov et al., 2015). Transitions between substrate-associated and suspended habitats are possibly linked to the mode of sexual reproduction. The numerous, flagellum-propelled male gametes of oogamous species might facilitate colonization of the plankton, whereas the few, aflagellated gametes of isogamous lineages might hinder such invasions (Kooistra et al., 2009). With respect to salinity, most diatom genera are restricted to either marine or freshwaters (Round et al., 1990), and colonizations of freshwaters are considered infrequent and irreversible (Mann, 1999; Round & Sims, 1980). Notwithstanding, reconstructions of the timing and direction of traffic across the salinity gradient have revealed temporally spaced and bidirectional colonizations (Alverson, 2014; Alverson et al., 2007; Ruck et al., 2016). Importantly, however, previous studies have either focused on relatively small clades, making it difficult to derive broadly applicable conclusions (Beaulieu & O'Meara, 2018), or have not explored the interaction between rates of diversification and habitat transitions, a key component of testing character-dependent diversification (Maddison, 2006).

Here we characterize diatom evolution across the plankton–benthos and marine–freshwater divides using a large, time-calibrated phylogeny representative of the full breadth of extant diatom diversity. To account for variation in the rate of diversification and colonizations across environments, we employed a hidden state speciation and extinction modeling framework (HiSSE; Beaulieu & O'Meara 2016) modified for multiple characters. In doing so, we were able to jointly estimate rates of colonization and diversification across multiple environments and account for possible interactions between the focal characters (i.e., marine plankton, marine benthos, freshwater plankton, and freshwater benthos). We discuss the implications of our findings for diatom ancestry, diversification, and phylogenetic diversity across the ecologically important marine–freshwater and plankton–benthos divides.

## Materials and Methods

**Phylogeny and diversity data** We used a time-calibrated phylogeny of 1,151 diatoms (Nakov et al., 2018)—the largest available phylogenetic tree of diatoms that covers their known phylogenetic and ecological breadth. We scored 1,132 out of the 1,151 species for two characters: “habitat” (plankton or benthos) and “salinity” (marine or freshwater) based on taxonomic compilations (Hasle & Syvertsen, 1996; Lobban et al., 2012; Round et al., 1990), previous work on character evolution (Alverson et al., 2007; Nakov et al., 2015; Ruck et al., 2016), or direct observations of culture or field samples.

Given a total estimated diatom diversity of up to 100,000 species (Mann & Vanormelingen, 2013), this phylogeny, although the most taxonomically inclusive to date, still falls well short of the full diatom diversity. To account for this under-sampling in our diversification analyses, we estimated sampling fractions for each environment, e.g., the fraction of sampled marine species from the total number of marine species described to date. Data for salinity (marine–freshwater) were obtained from DiatomBase (Kociolek et al., 2017), which reports the total estimated number of species per genus and the total estimated number of marine species per genus, allowing for a straightforward calculation of the number of non-marine (freshwater) species. Similar data were not available for planktonic and benthic lineages, so we used the primary taxonomic literature to record the number of species per genus occurring in the plankton or benthos. Based on these numbers, we then derived a per-genus fraction of planktonic species and multiplied the total estimated genus-level diversity by this fraction to obtain an estimate of the number of planktonic and benthic species per genus. We summed these numbers across genera from the entire phylogeny to approximate the diatom-wide estimates of species richness in each environment.

**Evolutionary models** Hypotheses about associations between lineage diversification and discretely coded traits or environments are often tested using state speciation and extinction models (-SSE; Beaulieu & O’Meara 2016; FitzJohn et al. 2009; Goldberg et al. 2011; Maddison et al. 2007). These models jointly estimate the rates of evolution of a focal character (i.e., transitions between states) and rates of diversification (i.e., speciation and extinction) and can therefore account for potential interactions between these two factors. In one of these models, the binary state speciation and extinction (BiSSE; FitzJohn et al. 2009; Maddison et al. 2007), each character state has its own speciation and extinction rates that are different from the parameters associated with the other state. This property provides a natural way to disentangle whether an imbalanced ratio of diversity between habitats reflects differences in diversification, or alternatively, asymmetry in rates of colonization between alternative habitats (Maddison, 2006; Maddison et al., 2007).

An assumption of the BiSSE model is that the rates of speciation, extinction, and transition are shared by all lineages occupying a particular environment (Beaulieu & O’Meara, 2016; Maddison et al., 2007). For example, with a BiSSE model we can test whether marine and freshwater diatoms diversified at different rates, but with the constraint that all marine and all freshwater lineages share the same rate. Whether this assumption is reasonable depends on the phylogeny and how the diversification regimes have been defined. In our case, with a phylogeny representing about 200 million years (My) of evolutionary history, known rate variation in diversification related to life history traits (Nakov et al., 2018), and broadly defined diversification regimes (e.g., tropical and polar oceans are grouped within the same “marine” regime), it is appropriate to assess and accommodate expected rate variation within our focal regimes.

Two approaches within the SSE family of models can be used to detect and account for heterogeneity in diversification on a phylogeny while co-estimating the transition rates between character states. They both use hidden (unobserved) states to implicitly account for the many potential factors, aside from the focal characters, that may have influenced diversification and character transition rates (Beaulieu & O’Meara, 2016; Caetano et al., 2018). First, hidden state speciation and extinction models (HiSSE; Beaulieu & O’Meara 2016) extend the BiSSE model by allowing two hidden states within each state of the focal character, but still assume that diversification is character-dependent. Second, character-independent models (CID) remove the link between diversification and the focal character entirely and associate diversification rates only to hidden (or unobserved) traits. By allowing rate variation independent of the focal character, the CID models represent non-trivial null models for testing hypotheses of state dependent speciation and extinction (Beaulieu & O’Meara, 2016; Caetano et al., 2018). In other words, for cases in which diversification rates vary across the phylogeny, parameter-rich SSE

models might be favored even when the diversity patterns are not tied to the characters singled out for study (Beaulieu & O'Meara, 2016; Caetano et al., 2018; Rabosky & Goldberg, 2015). Evaluation of CID models, in turn, allows more realistic assessments of whether variation in diversification rates across the diatom phylogeny was related to habitat, salinity, or other unobserved characters.

We fit a total of five models for each binary character: (1) a "trivial null" model (number of parameters,  $k=3$ , Fig. 1A) with one parameter controlling the turnover rate (defined as speciation+extinction, which measures the rate of any event, birth or death, occurring per unit time) for both observed states, and one parameter controlling the rate of character transitions (e.g., marine  $\rightarrow$  freshwater); (2) a BiSSE model ( $k=5$ , Fig. 1A) with separate turnover rates estimated for lineages living in alternate environments and asymmetric transitions between environments (e.g., marine  $\rightarrow$  freshwater  $\neq$  freshwater  $\rightarrow$  marine); (3) a HiSSE model ( $k=13$ ) with separate turnover rates for each combination of observed and hidden states and eight transition rates for changes between states (e.g., marine hidden state A  $\rightarrow$  marine hidden state B)—this model disallowed dual transitions in which both the observed and hidden state changed (e.g., marine hidden state A  $\rightarrow$  freshwater hidden state B; Fig. 1A); (4) a CID2 model ( $k=6$ ) with two turnover rate parameters similar to the BiSSE model, but unlinked from the observed character states; and (5) a CID4 model ( $k=8$ ) with as many as five diversification parameters matching the complexity of HiSSE (Fig. 1A). In all cases, we kept the extinction fraction (defined as extinction/speciation, which measures the ratio of death and birth events per unit time) constant across states.

For the combined habitat+salinity character, we extended the HiSSE and CID model framework to handle a four-state case [i.e., marine-plankton (MP), marine-benthos (MB), freshwater-plankton (FP), and freshwater-benthos (FB)]. In this analysis, we again fit a "trivial null" model that assumed no variation in diversification and a multistate speciation and extinction model (MuSSE; FitzJohn 2012) that linked diversification rates to the four character states, but assumed no variation within regimes (Fig. 1B). We then fit two multistate speciation and extinction models with hidden traits, MuHiSSE, and seven multistate character-independent models (MuCID) with increasing numbers of hidden traits (MuCID2 through MuCID8; Fig 1B). The most complex MuCID8 model had eight parameters for turnover and one for extinction fraction, matching the complexity of the MuHiSSE model, but with diversification parameters unlinked to the observed character states (Fig. 1B). For both types of models, we allowed the transition rates between alternative environments to differ (e.g., MB  $\rightarrow$  MP  $\neq$  MP  $\rightarrow$  MB), and again we disallowed dual transitions (e.g., MB  $\rightarrow$  FP). The two MuHiSSE models differed in how they handle transitions between the hidden states. In the first one, we assumed one rate for all transitions (e.g., MB hidden state A  $\rightarrow$  MB hidden state B = FP hidden state A  $\rightarrow$  FB hidden state B), while in the second one we allowed separate rates of transition from hidden state A to B and hidden state B to A (e.g., MB hidden state A  $\rightarrow$  MB hidden state B  $\neq$  MB hidden state B  $\rightarrow$  MB hidden state A; Fig 1B).

In all cases, whether or not we allowed a separate estimate of turnover rate for each state, the extinction fraction was always fixed across observed and hidden states. It is important to note, however, that while extinction fraction is constrained among states, converting turnover and extinction fraction into speciation and extinction does not preclude separate birth and death rate for each state (Beaulieu & O'Meara, 2016). We also accounted for incomplete sampling by incorporating the sampling fractions described above directly into our diversification analyses (Beaulieu & O'Meara, 2016; FitzJohn, 2012). This approach assumes random sampling of each observed character state. For all binary and multistate models, we performed  $\geq 50$  maximum likelihood optimizations, each initiated from a distinct starting point.

## Results and Discussion

### Diatom diversification across the marine–freshwater and plankton–benthos divides

Diatom diversity data showed strong disparities in species richness across both the marine–freshwater and plankton–benthos contrasts (Kocielek et al., 2017; Mora et al., 2011). Approximately 70% of the species were freshwater and 83% were benthic. These imbalanced diversity ratios suggested that diversification rates might be related to one or both of the focal characters. Indeed, BiSSE models that linked diversification and character transition rates to the alternate environments provided a much better fit than models that assumed one rate across the tree (Fig. 2A,B). Freshwater and benthic lineages, as expected given the diversity ratios, had rates



| A. Binary |            |    |    | B. Multistate |            |     |            |     |        |     |            |     |     |     |     |     |     |    |     |     |     |     |   |   |
|-----------|------------|----|----|---------------|------------|-----|------------|-----|--------|-----|------------|-----|-----|-----|-----|-----|-----|----|-----|-----|-----|-----|---|---|
| Null      | M          | F  |    | Null          | MP         | MB  | FP         | FB  |        |     |            |     |     |     |     |     |     |    |     |     |     |     |   |   |
|           | $\tau$     | 1  | 2  |               | $\tau$     | 1   | 1          | 1   | 1      |     |            |     |     |     |     |     |     |    |     |     |     |     |   |   |
|           | $\epsilon$ | 3  | 3  |               | $\epsilon$ | 2   | 2          | 2   |        |     |            |     |     |     |     |     |     |    |     |     |     |     |   |   |
| BiSSE     | M          | F  |    | MuSSE         | MP         | MB  | FP         | FB  |        |     |            |     |     |     |     |     |     |    |     |     |     |     |   |   |
|           | $\tau$     | 1  | 2  |               | $\tau$     | 1   | 1          | 2   | 2      |     |            |     |     |     |     |     |     |    |     |     |     |     |   |   |
|           | $\epsilon$ | 3  | 3  |               | $\epsilon$ | 3   | 3          | 3   |        |     |            |     |     |     |     |     |     |    |     |     |     |     |   |   |
| CID2      | M1         | F1 | M2 | F2            | MuCID2     | MP1 | MB1        | FP1 | FB1    | MP2 | MB2        | FP2 | FB2 |     |     |     |     |    |     |     |     |     |   |   |
|           | $\tau$     | 1  | 1  | 2             |            | 2   | $\tau$     | 1   | 1      | 1   | 1          | 2   | 2   | 2   | 2   |     |     |    |     |     |     |     |   |   |
|           | $\epsilon$ | 3  | 3  | 3             | 3          |     | $\epsilon$ | 3   | 3      | 3   | 3          | 3   | 3   | 3   |     |     |     |    |     |     |     |     |   |   |
| CID4      | M1         | F1 | M2 | F2            | M3         | F3  | M4         | F4  | MuCID8 | MP1 | MB1        | FP1 | FB1 | MP2 | MB2 | FP2 | FB2 | XX | MP8 | MB8 | FP8 | FB8 |   |   |
|           | $\tau$     | 1  | 1  | 2             | 2          | 3   | 3          | 4   |        | 4   | $\tau$     | 1   | 1   | 1   | 1   | 2   | 2   | 2  | 2   | ... | 8   | 8   | 8 | 8 |
|           | $\epsilon$ | 5  | 5  | 5             | 5          | 5   | 5          | 5   | 5      |     | $\epsilon$ | 9   | 9   | 9   | 9   | 9   | 9   | 9  | 9   | 9   | 9   | 9   | 9 | 9 |
| HiSSE     | M1         | F1 | M2 | F2            | MuHiSSE    | MP1 | MB1        | FP1 | FB1    | MP2 | MB2        | FP2 | FB2 |     |     |     |     |    |     |     |     |     |   |   |
|           | $\tau$     | 1  | 2  | 3             |            | 4   | $\tau$     | 1   | 2      | 3   | 4          | 5   | 6   | 7   | 8   |     |     |    |     |     |     |     |   |   |
|           | $\epsilon$ | 5  | 5  | 5             | 5          |     | $\epsilon$ | 9   | 9      | 9   | 9          | 9   | 9   | 9   |     |     |     |    |     |     |     |     |   |   |

**Figure 1.** Character-dependent and character-independent diversification models for binary (A) and multistate (B) codings of salinity and habitat. Column names in A correspond to coding for salinity (M=marine, F=freshwater) and the numbers 1–4 (e.g., M1, M2, F1, F2) represent the hidden states. Models for habitat (plankton–benthos) were the same. Column names in B correspond to the combined salinity+habitat states (MP=marine–plankton, MB=marine–benthos, FP=freshwater–plankton, FB=freshwater–benthos) and the numbers 1–8 represent the hidden states. Parameters denoted with  $\tau$  and  $\epsilon$  (rows) are net turnover (speciation+extinction) and extinction fraction (extinction/speciation), respectively. Here we show only the diversification parameters, but full model diagrams that include the character transition rates are shown in Fig S1.

of speciation and extinction (i.e., net turnover rate) that were 2.6 and 4.3 times faster, respectively, than their marine and planktonic counterparts. The ratio of extinction to speciation (the extinction fraction) was high in both analyses— 0.85 for the marine–freshwater and 0.92 for the plankton–benthos contrast. Both of these environmental gradients, according to the BiSSE models, appear to have been important in shaping the diversity of diatoms.

To assess the amount of variation in diversification and transition rates within the marine vs. freshwater and plankton vs. benthos regimes, we also evaluated character-dependent (HiSSE) and character-independent (CID) models that included hidden states, i.e., factors other than our focal characters that might have influenced diversification. For both characters, hidden state models provided a significantly improved fit relative to the BiSSE models, highlighting substantial variation in the rates of diversification within and transitions between regimes (Fig. 2A,B; Table S1). The HiSSE model was favored for salinity, while CID4 was best for habitat, in both cases with Akaike weights of  $\omega = 0.999$  (Fig. 2A-B; Table S1). The HiSSE model for salinity showed that in one hidden state, freshwater lineages speciated, but also went extinct, nearly 12 times faster than marine lineages, while in the other, turnover in marine lineages was three times faster (Table S2). For habitat, under the CID4 model, waiting times to either a speciation or extinction event across the four character-independent rate classes varied between nearly 53 and 0.4 My (Table S3).

In addition to estimating the most likely parameter values for predefined regimes, hidden state models also allow the reconstruction of the most likely hidden state occupied by each species. Averaging per-species diversification parameters, weighted by the probability of hidden states, provides a measure of rate variation within regimes. In other words, even when character-dependent diversification is supported, it is unlikely that all lineages assigned to a regime have diversified at the same rate, and this variation will be reflected in the hidden state reconstructions. Averaged over hidden states, waiting time to turnover events (either speciation or extinction in My) ranged between 2.1 and 8.5 My (mean across species  $\pm$  SD,  $6.0 \pm 2.1$  My) in marine lineages and between 1.2 and 6.2 My ( $2.85 \pm 1.43$  My) for freshwater species (Fig. 2D). The ranges for turnover in planktonic ( $4.75 \pm 3.46$  My) and benthic ( $4.94 \pm 3.48$  My) species were overlapping, with a minimum of 0.5 My and maximum of 12.3 My (Fig. 2E). For both binary characters, these tests highlighted broad variation in turnover rate within regimes (Fig. 2D,E).

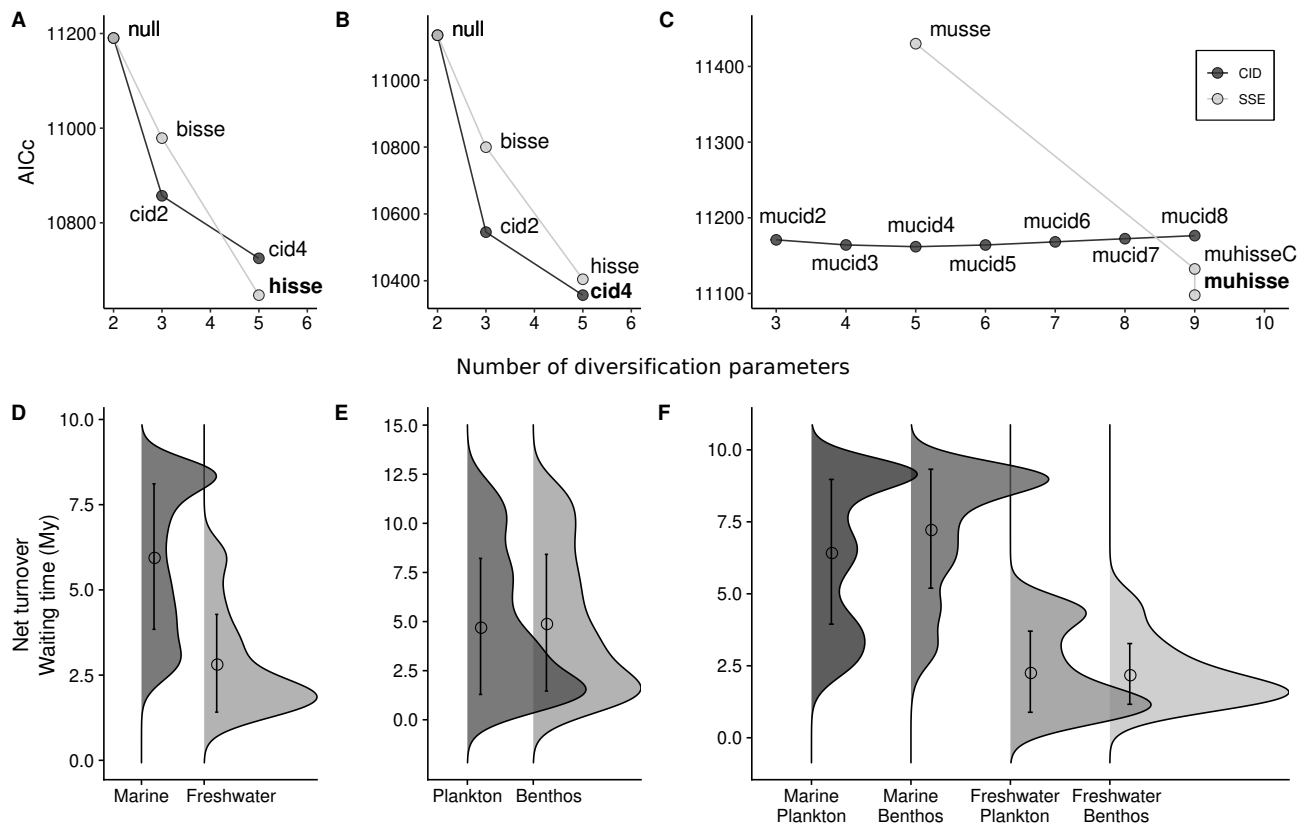

**Figure 2. Freshwater diatom lineages diversify faster than marine in both planktonic and benthic habitats. Shown are model selection and turnover rate variation for binary coding of salinity (A, D), binary coding of habitat (B, E) and four-state coding of the combined salinity+habitat characters (C, F). Panels A-C Show the Akaike information criterion scores (AICc, corrected for sample size) of state speciation and extinction (SSE) and character-independent (CID) models against the number of diversification parameters (turnover + extinction fraction). The best model—always one that accounts for unconsidered factors—is indicated by boldface text. Panels D-F show the differences between and variation within diversification regimes of net turnover (speciation + extinction). Circles and error bars are means and standard deviations while the density curves show the distributions of rates after averaging over hidden states. Parameters are shown as waiting times (inverse of rate), measured in millions of years (My).**

## Refined diversification regimes that combine salinity and habitat

One way to account for this variation is to combine salinity and habitat into a single four-state character: marine-plankton, marine-benthos, freshwater-plankton, and freshwater-benthos. With this approach, we can specifically test for differences between, for example, the plankton and benthos, while allowing for the possibility that planktonic lineages in fresh vs. saline waters also differ in diversification. As an example of why such an interaction might be appropriate, consider the age and longevity of freshwater lakes that support planktonic communities. The formation and lifespan of most lakes is linked to Earth's glaciation cycles, with only a few dozen long-lived tectonic basins whose formation predates the last interglacial (ca. 130–115 thousand years ago, Hampton et al. 2018; Mackay et al. 2010). As the majority of freshwater lakes are geologically recent and have relatively short lifespans, freshwater planktonic lineages might be under drastically different environmental pressures relative to the marine planktonic species from environments that have existed continuously since the formation of the oceans. An indication of these potential differences in diversification dynamics can be gleaned from the nearly wholesale change in relative abundance or composition of planktonic communities in sedimentary records from ancient lakes that closely follow glaciation and drought cycles (Cohen et al., 2007; Edlund & Stoermer, 2000; Mackay et al., 2010; Stone et al., 2011).

Another example of the importance of the salinity + habitat interaction is the size and connectivity of marine

vs. freshwater populations. Diatoms in marine environments have fewer physical barriers to migration and are generally expected to have broader geographic distributions and higher rates of gene flow (Palumbi, 1992, 1994), which together might result in lower speciation and extinction rates compared to freshwater diatoms inhabiting discontinuous and irregularly distributed habitats. Still, gene flow can be limited among marine diatom populations due to isolation by distance (Casteleyn et al., 2010) or ecology (Whittaker & Ryneerson, 2017), sometimes even at small spatial scales (Godhe & Härnström, 2010; Ryneerson & Armbrust, 2004; Sjöqvist et al., 2015), which suggests that population subdivision might be even stronger in freshwater lineages (Evans et al., 2009; Vanormelingen et al., 2008). This lends further support to the hypothesis that species turnover proceeds at different paces in, for example, lineages of marine plankton vs. freshwater plankton.

To assess diversification rate differences across the four habitat + salinity regimes, we implemented a multistate variant of the HiSSE model (MuHiSSE, Caetano et al. 2018), with a separate turnover parameter for each of the four states and two hidden states within each combination. To guard against false-positive selection of these highly parameterized models, we designed and tested a set of multistate character-independent (MuCID) models with increasing numbers of diversification parameters, up to a MuCID model with eight hidden traits that matches the complexity of the MuHiSSE model [eight turnover and one extinction fraction that can be transformed into eight speciation and eight extinction rates (Beaulieu & O'Meara, 2016); Fig. 1B].

Data for the combined salinity + habitat states mirrored disparities in species richness observed for the individual binary traits. Marine plankton accounted for 11%, marine benthos 20%, freshwater plankton 6%, and freshwater benthos 63% of diatom species. Many marine planktonic lineages have much deeper fossil records than benthic lineages (Sims et al., 2006), and freshwater lineages are generally nested within, and younger than, their marine counterparts (Alverson, 2014; Ruck et al., 2016). A superficial look at these raw diversity numbers suggests that younger lineages are disproportionately more diverse than older ones, perhaps due to different diversification dynamics within these habitats. Indeed, we found strong support for a MuHiSSE model (Akaike weight,  $\omega=0.999$ ) in which each of the four character states had separate diversification parameters and all transitions between states were free (Fig. 1B, 2C, Table S4).

Support for a character-dependent model indicated that the interaction between habitat and salinity was important, especially for freshwater lineages where the difference in turnover between planktonic and benthic lineages was substantial. Under the MuHiSSE model, the maximum likelihood estimates and 2 log likelihood support regions indicated that marine lineages from the plankton and benthos diversified under similar rates in both hidden states (Table S5). For freshwater lineages, the differences in net turnover between planktonic and benthic lineages were stronger and the estimated parameters had non-overlapping 2 log likelihood support regions (Table S5). Averaged over hidden states, turnover in freshwater habitats was 2–3 times faster than in marine environments (Fig. 2F). The relatively high global extinction fraction  $\epsilon = 0.77$  (Table S5), estimated here from extant species only, was similar to calculations made from Cenozoic marine fossils  $\epsilon = 0.75$  (Nakov et al., 2018).

The overwhelming support for models that include hidden traits shows that the focal factors alone (salinity and habitat) do not explain all of the variation in diversification rates across the phylogeny, even after partitioning the data into four groups. This further underscores the need to account for the multitude of environmental, ecological, and trait factors that were not explicitly considered, but whose cumulative effect on diversification might be comparable to the effects of salinity and habitat. This can be illustrated by comparing the differences in diversification between environments to the differences between hidden states within an environment. For example, marine planktonic lineages reconstructed in the second hidden state had a waiting time to a turnover event (i.e., a speciation or extinction event) of about 1.6 My. This was comparable to marine benthic lineages in the same hidden state (1.7 My), but was several times shorter than marine planktonic lineages in the first hidden state (10.3 My; Fig. 3; Table S5). In other words, the alternative suspended vs. substrate-associated habitats conferred a smaller difference in diversification compared to differences conferred by unobserved factors approximated by the hidden states (Fig 3).

It is worth considering what some of these unmeasured factors might be. For example, differences in age, size, depth, and longevity between lakes of glacial, tectonic, and volcanic origin might be driving some of the variation within freshwaters. Likewise, the drastic contrast in conditions experienced by diatom communities in nutrient-rich marine polar waters vs. oligotrophic oceanic gyres might partially explain hidden state components within marine lineages. Crampton et al. (2016) found that peaks in species turnover of marine

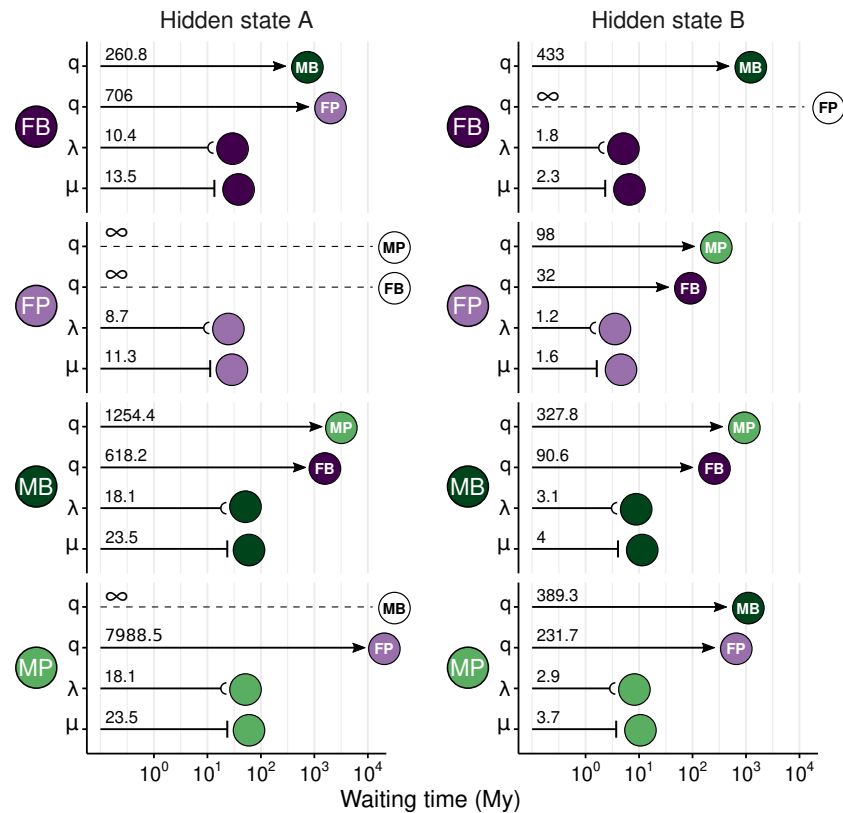

**Figure 3.** Waiting times (in million years, My) to speciation, extinction, and character transitions. The source environment is denoted with two-letter abbreviation on the y axis. For speciation ( $\lambda$ ) and extinction ( $\mu$ ) the color of the end-point circle matches the source environment. For transition rates ( $q$ ), the color and abbreviation at the end-point circle denote the destination of colonization. Numbers along the lines are the waiting times. Transitions with rates indistinguishable from zero (and infinity waiting times) are shown with dashed lines and open circles. Left and right side panels correspond to the two hidden states in the hidden-state multistate speciation and extinction model (MuHiSSE). Abbreviations: FB, freshwater-benthos; FP, freshwater-plankton; MB, marine-benthos; MP, marine-plankton.

Antarctic diatoms coincided with cooling of southern latitudes and expansion of ground and sea ice. Five such pulses above the baseline turnover have been inferred over the past 15 My (Crampton et al., 2016), contributing to relatively fast turnover within Antarctic diatom communities. Similar fluctuations in turnover are unlikely to have occurred in tropical ocean regions where temperature has been relatively constant over the past 15 My (Powell & Glazier, 2017). Therefore, it is possible that a portion of the variation captured by the hidden states might also be related to latitude. In this regard, diatoms are among the few lineages with a reverse latitudinal diversity gradient, which is thought to be a product of asymmetric range expansion toward higher latitudes (Powell & Glazier, 2017).

Within-regime variation in rates of diversification could also stem from traits that covary with diversity patterns in diatoms, e.g., motility of vegetative cells is also associated with a faster rate of diversification (Nakov et al., 2018). A comparison between motile and non-motile lineages showed that the probability of occupying the second hidden state—where net turnover was much faster (Fig. 3)—was higher in motile lineages (ANOVA,  $p < 0.001$ ) and suggested that motility might be an important factor not directly considered by our SSE models. It is important to reiterate that this *post hoc* exploration of potential hidden variables is not meant as a way to draw conclusions about other factors not directly tested here, but only as an illustration of the many other variables that may have contributed toward diatom diversification in addition to the marine-freshwater contrast.



## Diatom ancestry, absorbing habitats, and phylogenetic diversity

Ancestral state reconstructions supported a marine planktonic environment for the most recent common ancestor of diatoms, but they quickly colonized the marine benthos (see also [Kooistra et al., 2007](#)). The oldest benthic lineages were estimated to be about 180–175 My old (Fig. 4A). Colonizations of freshwater did not occur until much later—the oldest extant lineages to gain foothold in the freshwater plankton date back to 120–130 Mya, some 60 My after the origin of diatoms (Fig. 4A). Apart from a few isolated cases that have not left a substantial mark on present day diversity (e.g., *Ellerbeckia*, *Terpsinoe*, and *Pleurosira*), diatoms did not diversify within the freshwater benthos until after the evolution of anisogamous sexual reproduction and axial cell symmetry in the pennate diatom lineage (Fig. 4A). Marine benthic ancestry was inferred for the MRCA of the pennate clade, and within it, the clade of actively motile raphid diatoms (Fig. 4A). Overall, although our reconstructions supported a planktonic ancestry for diatoms, it is clear that the marine benthos has been the center stage of diatom evolution, seeding diversity across a range of environments (e.g., the marine plankton and freshwater benthos) throughout their evolutionary history (Fig. 4A).

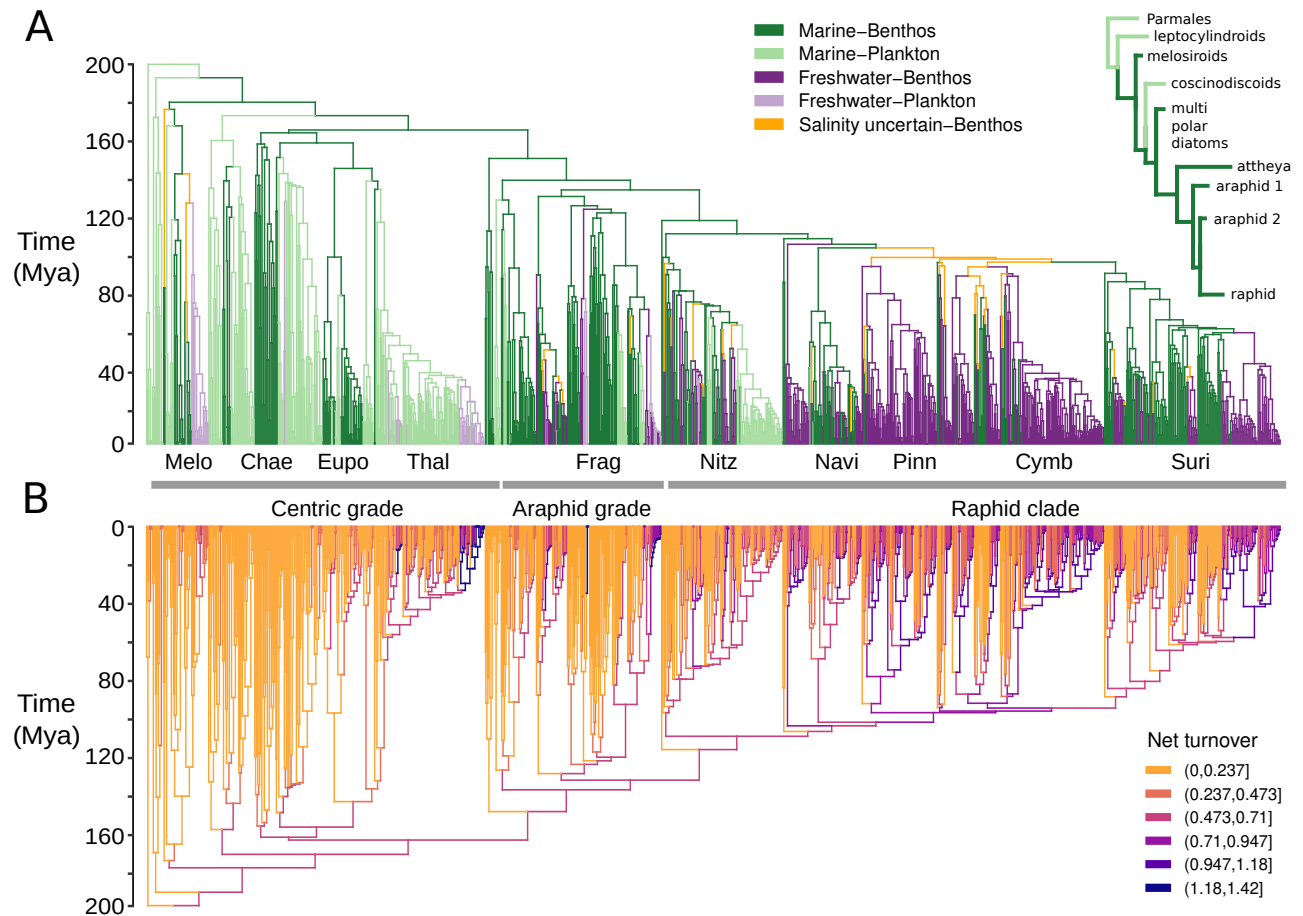

**Figure 4.** Ancestral state reconstructions of environments (marine–plankton, marine–benthos, freshwater–plankton, and freshwater–benthos, A) and net turnover (speciation + extinction, B). The high-turnover freshwater lineages are predominantly benthic among motile raphid pennate diatoms (e.g., Suri and Cymb) and predominantly planktonic within the non-motile centric and araphid grades (e.g., Frag, Thal, and Melo). The inset in A highlights ancestral reconstructions along the backbone of the tree showing marine–planktonic ancestry of all diatoms followed by an early colonization of the benthos. Abbreviations: Mya, millions of years ago; Melo, Melosirales; Chae, Chaetocerotales; Eupo, Eupodiscales; Thal, Thalassiosirales; Frag, fragilaroids; Nitz, Bacillariales; Navi, naviculoids; Pinn, pinnulariids; Cymb, Cymbellales; Suri, Surirellales; Parm, Parmales; Lept, Leptocylindrales + Corethrales; Cosc, Coscinodiscales + Rhizosoleniales.

A long-held view in diatom ecology and evolution is that colonizations of freshwater are infrequent and irreversible events (e.g., the Rubicon hypothesis of Mann 1999), suggesting that the modern freshwater flora has been assembled from a small set of phylogenetically diverse colonizers (rarity), and that once adapted to freshwaters, these lineages rarely, if ever, cross back to their ancestral marine habitat (irreversibility). The freshwater diatom flora is without question a composite of phylogenetically distant lineages that trace back to independent colonization events (Fig. 4), but the extent to which freshwater lineages have seeded diversity in the marine environment has not been tested at the level of all diatoms and in a framework that accounts for the interaction between rates of colonization and diversification.

The hypothesis of a unidirectional (marine-to-freshwater only) bridge across the salinity barrier implicates freshwaters as absorbing, meaning that marine colonists invade, adapt, and specialize to the point that transitions back to the ocean are unlikely. In modeling terms, this would translate as asymmetric transition rates, with the rates of transition from marine to fresh waters far exceeding the reverse. By simultaneously estimating the diversification and transition rates, our models provided a powerful test of this hypothesis, and accounting for rate heterogeneity within regimes allows for the possibility that salinity is a Rubicon in some, but not all, diatom lineages. Our analysis of the binary marine vs. freshwater data revealed that waiting times for marine-to-freshwater colonizations were indeed dependent on hidden factors. In some lineages, freshwater colonizations took about five times longer than the reverse, whereas in others the waiting time for marine-to-freshwater transitions was about half the waiting time of freshwater-to-marine transitions. Under the MuHiSSE model, which further allowed for the possibility that marine-to-freshwater transitions differ between the plankton and benthos, in all but one case marine-to-freshwater colonization took longer to occur than the reverse freshwater-to-marine transitions (Fig. 3). It therefore appears that traditional notions about the nature of the salinity barrier in diatoms, specifically the irreversibility of freshwater colonizations, are largely unsupported by the data and might apply only to a subset of diatoms where recolonization of marine habitats is slower but not impossible (Fig. 3).

Transition rates in the different hidden states also suggested that certain types of colonizations have drastically different probabilities. For example, take the contrast in rates of outflow from the marine and freshwater plankton between the first and second hidden states. For some lineages, the plankton represented an absorbing habitat, where they might have diversified, but transitions away from this habitat were extremely rare or impossible (Fig. 3). Yet, in other lineages, outflow from the freshwater plankton was among the most common type of transition (waiting times of 97 and 32 My; Fig. 3). These transition rates, combined with the broad variation and bimodal distribution of turnover in freshwater plankton (Fig. 2F), imply that for some lineages the freshwater plankton is an absorbing state, where following colonizations, lineages diversify but do not emigrate, but for others, the freshwater plankton is a transient state, with a retention time much shorter than any other state. Moreover, when we consider the somewhat short-lived nature of freshwater planktonic habitats over deep geologic timescales, these findings suggest an explanation regarding the very low fraction of diatom diversity found in the freshwater plankton and the relatively narrow phylogenetic breadth of these communities. The few lineages that have diversified substantially in the freshwater plankton are almost entirely restricted to it and have been largely sourced from the marine plankton (e.g., the genus *Aulacoseira* within marine planktonic Melosirales or cyclostephanoid diatoms within the ancestrally marine planktonic Thalassiosirales). In turn, for the vast majority of the remaining lineages, colonizations of freshwater plankton were sporadic and did not lead to substantial species diversification (Fig. 4). This is in contrast to the much more phylogenetically diverse marine plankton, which has been colonized repeatedly by many marine benthic lineages (Fig. 4; see also Kooistra et al. 2007), harbors a considerable diversity of araphid (e.g., *Asterionellopsis* and *Thalassiosinema*) and raphid diatoms (e.g., *Fragilariopsis* and *Pseudo-nitzschia*; Fig. 4), and as suggested by the rates of outflow from the freshwater plankton, is also recolonized by freshwater planktonic lineages (Fig. 3). These observations, combined with the non-uniform recruitment to the freshwater plankton—several old and species-rich marine planktonic lineages have not crossed into freshwaters or remain disproportionately more diverse in saline waters (e.g., Rhizosoleniales, Coscinodiscales, and Chaetocerales; Fig. 4; Kooistra et al. 2007)—also suggest that marine planktonic diatom assemblages are phylogenetically and functionally more diverse compared freshwater planktonic communities.

## Summary

One of the most prominent features of aquatic biodiversity is the disparity in species richness between marine and freshwater habitats. Marine habitats are geologically old, have existed continuously since the formation of the oceans and amount to > 99% habitable water on Earth. In turn, freshwater habitats are much younger and have shorter lifespans dictated by glaciation, droughts, or tectonic events. Surprisingly, in lineages with substantial diversity across the salinity gradient, the younger and derived freshwater clades are often more diverse than their marine counterparts. How these diversity patterns were shaped is unclear, with contrasting evidence for faster diversification in freshwater on one side (Bloom et al., 2013) and faster extinction in marine environments on the other (Miller & Wiens, 2017). Advancing our understanding of this topic can benefit from consideration of microbial lineages, which are commonly diverse at both ends of the salinity gradient, as well as from multifactor approaches, which can help disentangle the effect of salinity from other important contributing factors. Diatoms, a species-rich and ecologically important clade of eukaryotic algae, are ideally suited to these questions because they mirror the marine–freshwater disparity in species richness observed in many animal groups but have different population, dispersal, and physiological properties consequential for colonization and diversification across the salinity gradient.

We used a diatom phylogeny encompassing the full breadth of their extant diversity, together with species richness data across the marine–freshwater gradient, to evaluate how transitions between habitats with different salinities might have influenced diversification. Our analyses also incorporated data for the plankton–benthos divide, another important environmental contrast with a similarly imbalanced diversity ratio, in a modeling framework that controlled for possible interactions between habitat and salinity and accounted for the effects of other possible unobserved factors. Current data suggest that unlike many other aquatic lineages (Darling et al., 2009; Hart et al., 2003; Rigby, 1997; Rigby & Milsom, 1996; Signor & Vermeij, 1994), diatoms were ancestrally planktonic, but colonized the benthos early on in their evolution, such that most of their diversity was subsequently seeded by repeated emigration from the marine benthos (see also Kooistra et al., 2007). Marine-to-freshwater transitions are reversible, challenging longstanding hypotheses about the nature of the salinity barrier in diatoms. While the marine plankton was sourced from a diverse set of marine benthic, and to a lesser extent, freshwater planktonic lineages, freshwater planktonic habitats were colonized by a much narrower pool of mainly marine planktonic lineages, suggesting that the marine planktonic assemblages are phylogenetically and functionally more diverse than their freshwater counterparts.

Overall, we found a strong support for an association between diatom diversification and the marine–freshwater divide, however, unlike various animal groups (Bloom et al., 2013; Miller & Wiens, 2017), freshwater diatoms—either planktonic or benthic—both speciated and went extinct faster than marine lineages. More generally, our results show that diversity patterns in diatoms, and presumably other lineages, are unlikely attributable to a few, commonly broadly defined regimes. Support for character-dependent diversification can, in some cases, be overshadowed by broad variation in diversification rates arising from unconsidered factors whose individual or aggregate effects might equal or surpass the influence of factors traditionally considered most important. We illustrate how considering multiple possibly interacting characters might provide a more refined understanding of diversification in old, widespread, and species-rich clades.

## Author contributions

TN, JMB, AJA designed the study. TN collected the data. JMB developed novel analytical tools. TN and JMB performed analyses. TN and AJA drafted the paper. All authors edited the final draft and approved the submission.

## Acknowledgments

We thank Elizabeth Ruck for discussions about diatom phylogeny and distributions, and Daniel Caetano and James Boyko for helpful conversations about modeling diversification and trait evolution. This work was supported by grants from the NSF (DEB-1353131 to AJA) and from the Simons Foundation (403249 to AJA).

## References

- Alverson AJ, 2014. Timing marine–freshwater transitions in the diatom order Thalassiosirales. *Paleobiology*, 40:91–101.
- Alverson AJ, Jansen RK, & Theriot EC, 2007. Bridging the Rubicon: Phylogenetic analysis reveals repeated colonizations of marine and fresh waters by thalassiosiroid diatoms. *Mol. Phylogenet. Evol.*, 45:193–210.
- Appeltans W, Ah Yong ST, Anderson G, Angel MV, Artois T, Bailly N, Bamber R, Barber A, Bartsch I, Berta A, Błażewicz-Paszkowycz M, Bock P, Boxshall G, Boyko CB, Brandão SN, Bray RA, Bruce NL, Cairns SD, Chan TY, Cheng L, Collins AG, Cribb T, Curini-Galletti M, Dahdouh-Guebas F, Davie PJF, Dawson MN, De Clerck O, Decock W, De Grave S, de Voogd NJ, Domning DP, Emig CC, Erséus C, Eschmeyer W, Fauchald K, Fautin DG, Feist SW, Fransen CHJM, Furuya H, Garcia-Alvarez O, Gerken S, Gibson D, Gittenberger A, Gofas S, Gómez-Daglio L, Gordon DP, Guiry MD, Hernandez F, Hoeksema BW, Hopcroft RR, Jaume D, Kirk P, Koedam N, Koenemann S, Kolb JB, Kristensen RM, Kroh A, Lambert G, Lazarus DB, Lemaitre R, Longshaw M, Lowry J, Macpherson E, Madin LP, Mah C, Mapstone G, McLaughlin PA, Mees J, Meland K, Messing CG, Mills CE, Molodtsova TN, Mooi R, Neuhaus B, Ng PKL, Nielsen C, Norenburg J, Opresko DM, Osawa M, Paulay G, Perrin W, Pilger JF, Poore GCB, Pugh P, Read GB, Reimer JD, Rius M, Rocha RM, Saiz-Salinas JJ, Scarabino V, Schierwater B, Schmidt-Rhaesa A, Schnabel KE, Schotte M, Schuchert P, Schwabe E, Segers H, Self-Sullivan C, Shenkar N, Siegel V, Sterrer W, Stöhr S, Swalla B, Tasker ML, Thuesen EV, Timm T, Todaro MA, Turon X, Tyler S, Uetz P, van der Land J, Vanhoorne B, van Ofwegen LP, van Soest RWM, Vanaverbeke J, Walker-Smith G, Walter TC, Warren A, Williams GC, Wilson SP, & Costello MJ, 2012. The magnitude of global marine species diversity. *Curr. Biol.*, 22:2189–2202.
- Armbrust EV, 2009. The life of diatoms in the world’s oceans. *Nature*, 459:185–192.
- Beaulieu JM & O’Meara BC, 2016. Detecting hidden diversification shifts in models of trait-dependent speciation and extinction. *Syst. Biol.*, 65:583–601.
- Beaulieu JM & O’Meara BC, 2018. Can we build it? Yes we can, but should we use it? Assessing the quality and value of a very large phylogeny of campanulid angiosperms. *Am. J. Bot.*, 105:417–432.
- Bloom DD, Weir JT, Piller KR, & Lovejoy NR, 2013. Do freshwater fishes diversify faster than marine fishes? A test using state-dependent diversification analyses and molecular phylogenetics of new world silversides (Atherinopsidae). *Evolution*, 67:2040–2057.
- Bowler C, Vardi A, & Allen AE, 2010. Oceanographic and biogeochemical insights from diatom genomes. *Ann. Rev. Mar. Sci.*, 2:333–365.
- Caetano D, O’Meara B, & Beaulieu J, 2018. Hidden state models improve the adequacy of state-dependent diversification approaches using empirical trees, including biogeographical models. *Evolution (In press)*. Biorxiv: 302729.
- Casteleyn G, Leliaert F, Backeljau T, Debeer AE, Kotaki Y, Rhodes L, Lundholm N, Sabbe K, & Vyverman W, 2010. Limits to gene flow in a cosmopolitan marine planktonic diatom. *Proc. Natl. Acad. Sci. U. S. A.*, 107:12 952–12 957.
- Cavalier-Smith T, 2009. Megaphylogeny, cell body plans, adaptive zones: causes and timing of eukaryote basal radiations. *J. Eukaryot. Microbiol.*, 56:26–33.
- Cohen AS, Stone JR, Beuning KRM, Park LE, Reinthal PN, Dettman D, Scholz CA, Johnson TC, King JW, Talbot MR, Brown ET, & Ivory SJ, 2007. Ecological consequences of early Late Pleistocene megadroughts in tropical Africa. *Proc. Natl. Acad. Sci. U. S. A.*, 104:16 422–16 427.
- Crampton JS, Cody RD, Levy R, Harwood D, McKay R, & Naish TR, 2016. Southern Ocean phytoplankton turnover in response to stepwise Antarctic cooling over the past 15 million years. *Proceedings of the National Academy of Sciences*, 113:6868–6873.

- Darling KF, Thomas E, Kasemann SA, Seears HA, Smart CW, & Wade CM, 2009. Surviving mass extinction by bridging the benthic/planktic divide. *Proc. Natl. Acad. Sci. U. S. A.*, 106:12 629–12 633.
- Edlund MB & Stoermer EF, 2000. A 200,000-year, high-resolution record of diatom productivity and community makeup from Lake Baikal shows high correspondence to the marine oxygen-isotope record of climate change. *Limnol. Oceanogr.*, 45:948–962.
- Evans KM, Chepurinov VA, Sluiman HJ, Thomas SJ, Spears BM, & Mann DG, 2009. Highly differentiated populations of the freshwater diatom *Sellaphora capitata* suggest limited dispersal and opportunities for allopatric speciation. *Protist*, 160:386–396.
- FitzJohn RG, 2012. Diversitree: Comparative phylogenetic analyses of diversification in R. *Methods Ecol. Evol.*, 3:1084–1092.
- FitzJohn RG, Maddison WP, & Otto SP, 2009. Estimating trait-dependent speciation and extinction rates from incompletely resolved phylogenies. *Syst. Biol.*, 58:595–611.
- Godhe A & Härnström K, 2010. Linking the planktonic and benthic habitat: genetic structure of the marine diatom *Skeletonema marinoi*. *Mol. Ecol.*, 19:4478–4490.
- Goldberg EE, Lancaster LT, & Ree RH, 2011. Phylogenetic inference of reciprocal effects between geographic range evolution and diversification. *Syst. Biol.*, 60:451–465.
- Grosberg RK, Vermeij GJ, & Wainwright PC, 2012. Biodiversity in water and on land. *Curr. Biol.*, 22:R900–3.
- Guinot G & Cavin L, 2015. Contrasting “Fish” Diversity Dynamics between Marine and Freshwater Environments. *Curr. Biol.*, 25:2314–2318.
- Hampton SE, McGowan S, Ozersky T, Viridis SGP, Vu TT, Spanbauer TL, Kraemer BM, Swann G, Mackay AW, Powers SM, Meyer MF, Labou SG, O’Reilly CM, DiCarlo M, Galloway AWE, & Fritz SC, 2018. Recent ecological change in ancient lakes. *Limnol. Oceanogr.*, 37:17.
- Hart MB, Hylton MD, Oxford MJ, Price GD, Hudson W, & Smart CW, 2003. The search for the origin of the planktic Foraminifera. *J. Geol. Soc. London*, 160:341–343.
- Hasle GR & Syvertsen EE, 1996. Marine diatoms. Identifying Marine Phytoplankton (Tomas, CR, ed.), 5-385.
- Kirst GO, 1990. Salinity Tolerance of Eukaryotic Marine Algae. *Annu. Rev. Plant Physiol. Plant Mol. Biol.*, 41:21–53.
- Kirst GO, 1996. Osmotic Adjustment in Phytoplankton and MacroAlgae. In: RP Kiene, PT Visscher, MD Keller, & GO Kirst, eds., *Biological and Environmental Chemistry of DMSP and Related Sulfonium Compounds*, pp. 121–129. Springer US, Boston, MA.
- Kocielek JP, Balasubramanian K, Blanco S, Coste M, Ector L, Liu Y, Kulikovskiy M, Lundholm N, Ludwig T, Potapova M, Rimet F, Sabbe K, Sala S, Sar E, Taylor J, Van de Vijver B, Wetzel CE, Williams DM, Witkowski A, & Witkowski J, 2017. DiatomBase. <http://www.diatombase.org>. Accessed: 2017-11-30.
- Kooistra WHCF, Forlani G, & De Stefano M, 2009. Adaptations of araphid pennate diatoms to a planktonic existence. *Mar. Ecol.*, 30:1–15.
- Kooistra WHCF, Gersonde R, Medlin LK, & Mann DG, 2007. CHAPTER 11 - The Origin and Evolution of the Diatoms: Their Adaptation to a Planktonic Existence. In: PG Falkowski & AH Knoll, eds., *Evolution of Primary Producers in the Sea*, pp. 207–249. Academic Press, Burlington.
- Larsen BB, Miller EC, Rhodes MK, & Wiens JJ, 2017. Inordinate Fondness Multiplied and Redistributed: The Number of Species on Earth and the New Pie of Life. *Q. Rev. Biol.*, 92:229–265.



- Lee CE & Bell MA, 1999. Causes and consequences of recent freshwater invasions by saltwater animals. *Trends Ecol. Evol.*, 14:284–288.
- Lobban CS, Scheffter M, Jordan RW, Arai Y, Sasaki A, Theriot EC, Ashworth M, Ruck EC, & Pennesi C, 2012. Coral-reef diatoms (Bacillariophyta) from Guam: New records and preliminary checklist, with emphasis on epiphytic species from farmer-fish territories. *Micronesica*, 43:237–479.
- Logares R, Bråte J, Bertilsson S, Clasen JL, Shalchian-Tabrizi K, & Rengefors K, 2009. Infrequent marine–freshwater transitions in the microbial world. *Trends Microbiol.*, 17:414–422.
- Logares R, Shalchian-Tabrizi K, Boltovskoy A, & Rengefors K, 2007. Extensive dinoflagellate phylogenies indicate infrequent marine-freshwater transitions. *Mol. Phylogenet. Evol.*, 45:887–903.
- Lozupone CA & Knight R, 2007. Global patterns in bacterial diversity. *Proc. Natl. Acad. Sci. U. S. A.*, 104:11 436–11 440.
- Mackay AW, Edlund MB, Khursevich G, & Others, 2010. Diatoms in ancient lakes. *The Diatoms: Applications for the environmental and earth sciences*, 2:209–228.
- Maddison WP, 2006. Confounding asymmetries in evolutionary diversification and character change. *Evolution*, 60:1743–1746.
- Maddison WP, Midford PE, & Otto SP, 2007. Estimating a binary character’s effect on speciation and extinction. *Syst. Biol.*, 56:701–710.
- Mann DG, 1999. Crossing the Rubicon: The effectiveness of the marine/freshwater interface as a barrier to the migration of diatom germplasm. In: *Proceedings of the 14th International Diatom Symposium, Koenigstein, 1999*, pp. 1–21.
- Mann DG & Vanormelingen P, 2013. An inordinate fondness? The number, distributions, and origins of diatom species. *J. Eukaryot. Microbiol.*, 60:414–420.
- Miller EC & Wiens JJ, 2017. Extinction and time help drive the marine-terrestrial biodiversity gradient: Is the ocean a deathtrap? *Ecol. Lett.*, 20:911–921.
- Mora C, Tittensor DP, Adl S, Simpson AGB, & Worm B, 2011. How Many Species Are There on Earth and in the Ocean? *PLoS Biol.*, 9:e1001 127.
- Nakov T, Ashworth M, & Theriot EC, 2015. Comparative analysis of the interaction between habitat and growth form in diatoms. *ISME J.*, 9:246–255.
- Nakov T, Beaulieu JM, & Alverson AJ, 2018. Accelerated diversification is related to life history and locomotion in a hyperdiverse lineage of microbial eukaryotes (Diatoms, Bacillariophyta). *New Phytol.*, 219:462–473.
- Palumbi SR, 1992. Marine speciation on a small planet. *Trends Ecol. Evol.*, 7:114–118.
- Palumbi SR, 1994. Genetic Divergence, Reproductive Isolation, and Marine Speciation. *Annu. Rev. Ecol. Syst.*, 25:547–572.
- Powell MG & Glazier DS, 2017. Asymmetric geographic range expansion explains the latitudinal diversity gradients of four major taxa of marine plankton. *Paleobiology*, 43:196–208.
- Rabosky DL & Goldberg EE, 2015. Model inadequacy and mistaken inferences of trait-dependent speciation. *Syst. Biol.*, 64:340–355.
- Rigby S, 1997. A comparison of the colonization of the planktic realm and the land. *Lethaia*, 30:11–17.
- Rigby S & Milsom C, 1996. Benthic origins of zooplankton: An environmentally determined macroevolutionary effect. *Geology*, 24:52–54.

- Round FE, Crawford RM, & Mann DG, 1990. *Diatoms: Biology and Morphology of the Genera*. Cambridge University Press.
- Round FE & Sims PA, 1980. The distribution of diatom genera in marine and freshwater environments and some evolutionary considerations. In: *Proceedings of the sixth symposium on recent and fossil diatoms*, pp. 301–320.
- Ruck EC, Nakov T, Alverson AJ, & Theriot EC, 2016. Phylogeny, ecology, morphological evolution, and reclassification of the diatom orders Surirellales and Rhopalodiales. *Mol. Phylogenet. Evol.*, 103:155–171.
- Rynearson TA & Armbrust EV, 2004. Genetic differentiation among populations of the planktonic marine diatom *Ditylum brightwellii* (Bacillariophyceae). *J. Phycol.*, 40:34–43.
- Signor PW & Vermeij GJ, 1994. The plankton and the benthos: origins and early history of an evolving relationship. *Paleobiology*, 20:297–319.
- Sims PA, Mann DG, & Medlin LK, 2006. Evolution of the diatoms: Insights from fossil, biological and molecular data. *Phycologia*, 45:361–402.
- Sjöqvist C, Godhe A, Jonsson PR, Sundqvist L, & Kremp A, 2015. Local adaptation and oceanographic connectivity patterns explain genetic differentiation of a marine diatom across the North Sea–Baltic Sea salinity gradient. *Mol. Ecol.*, 24:2871–2885.
- Stone JR, Westover KS, & Cohen AS, 2011. Late Pleistocene paleohydrography and diatom paleoecology of the central basin of Lake Malawi, Africa. *Palaeogeogr. Palaeoclimatol. Palaeoecol.*, 303:51–70.
- Vanormelingen P, Chepurinov VA, Mann DG, Sabbe K, & Vyverman W, 2008. Genetic divergence and reproductive barriers among morphologically heterogeneous sympatric clones of *Eunotia bilunaris sensu lato* (Bacillariophyta). *Protist*, 159:73–90.
- Vermeij GJ, Grosberg RK, Marshall CR, & Motani R, 2018. The sea as deathtrap: comment on a paper by Miller and Wiens. *Ecol. Lett.*, 21:938–939.
- Whittaker KA & Rynearson TA, 2017. Evidence for environmental and ecological selection in a microbe with no geographic limits to gene flow. *Proc. Natl. Acad. Sci. U. S. A.*, 114:2651–2656.
- Wiens JJ, 2015. Faster diversification on land than sea helps explain global biodiversity patterns among habitats and animal phyla. *Ecol. Lett.*, 18:1234–1241.

## Supporting Information

### Supplementary table 1

**Table S1.** Comparison of character-dependent and character-independent models for the interaction between salinity and diversification or habitat and diversification. The models favored by AIC are in bold. Abbreviations: npd, number of diversification parameters (turnover + extinction fraction); npt, number of transition rate parameters;  $\omega$ AICc Akaike weight.

| Character                       | Model        | npd | npt | Log L    | AICc     | $\Delta$ AICc | $\omega$ AICc |
|---------------------------------|--------------|-----|-----|----------|----------|---------------|---------------|
| Salinity<br>Marine - Freshwater | <b>HiSSE</b> | 8   | 3   | -5310.42 | 10647.16 | 0             | 0.999         |
|                                 | CID4         | 8   | 8   | -5354.43 | 10725    | 77.84         | <0.001        |
|                                 | CID2         | 4   | 3   | -5422.5  | 10857.07 | 209.91        | <0.001        |
|                                 | BiSSE        | 4   | 2   | -5484.45 | 10978.95 | 331.79        | <0.001        |
|                                 | Null         | 2   | 1   | -5591.24 | 11190.49 | 543.33        | <0.001        |
| Habitat<br>Plankton - Benthos   | <b>CID4</b>  | 8   | 3   | -5170.4  | 10356.93 | 0             | 0.999         |
|                                 | HiSSE        | 8   | 8   | -5189.03 | 10404.38 | 47.45         | <0.001        |
|                                 | CID2         | 4   | 3   | -5266.67 | 10545.42 | 188.5         | <0.001        |
|                                 | BiSSE        | 4   | 2   | -5394.85 | 10799.75 | 442.82        | <0.001        |
|                                 | Null         | 2   | 1   | -5563.33 | 11134.66 | 777.73        | <0.001        |

### Supplementary table 2

**Table S2.** Parameter estimates for the best model (hidden-state speciation and extinction, HiSSE) for salinity (marine vs. freshwater). The numbers next to character states indicate the hidden states. The top four rows show the transition rates, and bottom two rows the net turnover rate (speciation + extinction) and extinction fraction (extinction/speciation).

|                     | Marine 1 | Freshwater 1 | Marine 2 | Freshwater 2 |
|---------------------|----------|--------------|----------|--------------|
| Marine 1            | NA       | 0.0223       | 0.0659   | 0            |
| Freshwater 1        | 0.0002   | NA           | 0        | 0.0023       |
| Marine 2            | 0.0045   | 0            | NA       | 0.0006       |
| Freshwater 2        | 0        | 0.0718       | 0.0003   | NA           |
| Net turnover        | 0.4389   | 0.1425       | 0.0571   | 0.6744       |
| Extinction fraction |          | 0.6562       |          |              |

### Supplementary table 3

**Table S3. Parameter estimates for the best model (character-independent with four hidden states, CID<sub>4</sub>) for habitat (plankton vs. benthos). The numbers next to diversification rates indicate the hidden states. The top three rows show the transition rates, and bottom five rows the net turnover rate (speciation + extinction) and extinction fraction (extinction/speciation).**

|                         | Rate   |
|-------------------------|--------|
| Plankton-to-Benthos     | 0.0015 |
| Benthos-to-Plankton     | 0.0011 |
| Between hidden states   | 0.0075 |
| Net turnover 1          | 0.0189 |
| Net turnover 2          | 2.5562 |
| Net turnover 3          | 0.1448 |
| Net turnover 4          | 0.5265 |
| Extinction fraction 1-4 | 0.9712 |

### Supplementary table 4

**Table S4. Comparison of character-dependent and independent models for the interaction between diversification and the combined salinity+habitat states. The favored model is in bold. Abbreviations: npd, number of diversification parameters (turnover + extinction fraction); npt, number of transition parameters;  $\omega$ AICc Akaike weight.**

| Model               | npd | npt | Log L     | AICc     | $\Delta$ AICc | $\omega$ AICc |
|---------------------|-----|-----|-----------|----------|---------------|---------------|
| <b>MuHiSSE full</b> | 9   | 18  | -5521.224 | 11096.45 | 0             | 0.999         |
| MuHiSSE red         | 9   | 17  | -5539.579 | 11131.16 | 34.71         | <0.001        |
| MuCID8 full         | 9   | 16  | -5562.629 | 11175.26 | 78.81         | <0.001        |
| MuCID7 full         | 8   | 15  | -5562.682 | 11171.36 | 74.91         | <0.001        |
| MuCID6 full         | 7   | 14  | -5562.692 | 11167.38 | 70.93         | <0.001        |
| MuCID5 full         | 6   | 13  | -5562.699 | 11163.4  | 66.95         | <0.001        |
| MuCID4 full         | 5   | 12  | -5563.632 | 11161.26 | 64.81         | <0.001        |
| MuCID3 full         | 4   | 11  | -5566.861 | 11163.72 | 11163.72      | <0.001        |
| MuCID2 full         | 3   | 10  | -5572.266 | 11170.53 | 11170.53      | <0.001        |

## Supplementary table 5

**Table S5. Parameter estimates and 2 log likelihood support region (in brackets) for the best model (hidden state multistate speciation and extinction, MuHiSSE) for the combined salinity + habitat character states [marine-plankton (MP), marine-benthos (MB), freshwater-plankton (FP), and freshwater-benthos (FB)]. The numbers next to character states indicate the hidden states. The top eight rows show the transition rates, and bottom two rows the net turnover rate (speciation + extinction) and extinction fraction extinction/speciation).**

|                 | MP <sub>1</sub>        | MB <sub>1</sub>        | FP <sub>1</sub>        | FB <sub>1</sub>        | MP <sub>2</sub>        | MB <sub>2</sub>         | FP <sub>2</sub>        | FB <sub>2</sub>        |
|-----------------|------------------------|------------------------|------------------------|------------------------|------------------------|-------------------------|------------------------|------------------------|
| MP <sub>1</sub> | NA                     | 0.0000 [0.0000-0.0007] | 0.0001 [0.0001-0.0006] | 0                      | 0.0028 [0.0027-0.0031] |                         |                        | 0                      |
| MB <sub>1</sub> | 0.0008 [0.0007-0.0010] | NA                     | 0                      | 0.0016 [0.0015-0.0017] |                        | 0.0028 [0.0027-0.0031]  | 0                      |                        |
| FP <sub>1</sub> | 0.0000 [0.0000-0.0008] | 0                      | NA                     | 0.0000 [0.0000-0.0010] |                        | 0                       | 0.0028 [0.0027-0.0031] |                        |
| FB <sub>1</sub> | 0                      | 0.0038 [0.0037-0.0041] | 0.0014 [0.0013-0.0015] | NA                     | 0                      |                         |                        | 0.0028 [0.0027-0.0031] |
| MP <sub>1</sub> | 0.0648 [0.0623-0.0695] |                        |                        | 0                      | NA                     | 0.0026 [0.0025-0.0027]  | 0.0043 [0.0039-0.0049] | 0                      |
| MB <sub>1</sub> |                        | 0.0648 [0.0623-0.0695] | 0                      |                        | 0.0030 [0.0029-0.0033] | NA                      | 0                      | 0.0110 [0.0104-0.0114] |
| FP <sub>1</sub> |                        | 0                      | 0.0648 [0.0623-0.0695] |                        | 0.0102 [0.0096-0.0109] | 0                       | NA                     | 0.0312 [0.0299-0.0331] |
| FB <sub>1</sub> | 0                      |                        |                        | 0.0648 [0.0623-0.0695] | 0                      | 0.0023 [0.0022-0.0025]  | 0.000 [0.0000-0.0007]  | NA                     |
| Turn.           | 0.0976 [0.0919-0.1084] | 0.0977 [0.0926-0.105]  | 0.2039 [0.1869-0.2204] | 0.1702 [0.1601-0.1838] | 0.6149 [0.5809-0.6597] | 0.5692 [0.5439-0.60003] | 1.4199 [1.3468-1.5127] | 0.9866 [0.9548-1.0566] |
| Ext. frac       | 0.7709 [0.7567-0.7853] |                        |                        |                        |                        |                         |                        |                        |



## Supplementary Figure 1

### Binary character models

**Null**

|            | M | F |
|------------|---|---|
| M          | - | 1 |
| F          | 1 | - |
| $\tau$     | 2 | 2 |
| $\epsilon$ | 3 | 3 |

**BiSSE**

|            | M | F |
|------------|---|---|
| M          | - | 2 |
| F          | 1 | - |
| $\tau$     | 3 | 4 |
| $\epsilon$ | 5 | 5 |

**CID2**

|            | M1 | F1 | M2 | F2 |
|------------|----|----|----|----|
| M1         | -  | 3  | 5  | -  |
| F1         | 1  | -  | -  | 7  |
| M2         | 2  | -  | -  | 8  |
| F2         | -  | 4  | 6  | -  |
| $\tau$     | 9  | 10 | 11 | 12 |
| $\epsilon$ | 13 | 13 | 13 | 13 |

**CID4**

|            | M1 | F1 | M2 | F2 |
|------------|----|----|----|----|
| M1         | -  | 2  | 3  | -  |
| F1         | 1  | -  | -  | 3  |
| M2         | 3  | -  | -  | 2  |
| F2         | -  | 3  | 1  | -  |
| $\tau$     | 4  | 4  | 5  | 5  |
| $\epsilon$ | 6  | 6  | 6  | 6  |

**HiSSE**

|            | M1 | F1 | M2 | F2 | M3 | F3 | M4 | F4 |
|------------|----|----|----|----|----|----|----|----|
| M1         | -  | 2  | 3  | -  | 3  | -  | 3  | -  |
| F1         | 1  | -  | -  | 3  | -  | 3  | -  | 3  |
| M2         | 3  | -  | -  | 2  | 3  | -  | 3  | -  |
| F2         | -  | 3  | 1  | -  | -  | 3  | -  | 3  |
| M3         | 3  | -  | 3  | -  | -  | 2  | 3  | -  |
| F3         | -  | 3  | -  | 3  | 1  | -  | -  | 3  |
| M4         | 3  | -  | 3  | -  | 3  | -  | -  | 2  |
| F4         | -  | 3  | -  | 3  | -  | 3  | 1  | -  |
| $\tau$     | 4  | 4  | 5  | 5  | 6  | 6  | 7  | 7  |
| $\epsilon$ | 8  | 8  | 8  | 8  | 8  | 8  | 8  | 8  |

### Multistate character models

**Null**

|            | MP | MB | FP | FB |
|------------|----|----|----|----|
| MP         | -  | 3  | 5  | -  |
| MB         | 1  | -  | -  | 7  |
| FP         | 2  | -  | -  | 8  |
| FB         | -  | 4  | 6  | -  |
| $\tau$     | 9  | 9  | 9  | 9  |
| $\epsilon$ | 10 | 10 | 10 | 10 |

**MuSSE**

|            | MP | MB | FP | FB |
|------------|----|----|----|----|
| MP         | -  | 3  | 5  | -  |
| MB         | 1  | -  | -  | 7  |
| FP         | 2  | -  | -  | 8  |
| FB         | -  | 4  | 6  | -  |
| $\tau$     | 9  | 10 | 11 | 12 |
| $\epsilon$ | 13 | 14 | 15 | 16 |

**MuHiSSE**

|            | MP1 | MB1 | FP1 | FB1 | MP2 | MB2 | FP2 | FB2 |
|------------|-----|-----|-----|-----|-----|-----|-----|-----|
| MP1        | -   | 3   | 5   | -   | 18  | -   | -   | -   |
| MB1        | 1   | -   | -   | 7   | -   | 18  | -   | -   |
| FP1        | 2   | -   | -   | 8   | -   | -   | 18  | -   |
| FB1        | -   | 4   | 6   | -   | -   | -   | -   | 18  |
| MP2        | 17  | -   | -   | -   | -   | 11  | 13  | -   |
| MB2        | -   | 17  | -   | -   | 9   | -   | -   | 15  |
| FP2        | -   | -   | 17  | -   | 10  | -   | -   | 16  |
| FB2        | -   | -   | -   | 17  | -   | 12  | 14  | -   |
| $\tau$     | 19  | 20  | 21  | 22  | 23  | 24  | 25  | 26  |
| $\epsilon$ | 27  | 27  | 27  | 27  | 27  | 27  | 27  | 27  |

### MuCID2

|            | MP1 | MB1 | FP1 | FB1 | MP2 | MB2 | FP2 | FB2 |
|------------|-----|-----|-----|-----|-----|-----|-----|-----|
| MP1        | -   | 3   | 5   | -   | 10  | -   | -   | -   |
| MB1        | 1   | -   | -   | 7   | -   | 10  | -   | -   |
| FP1        | 2   | -   | -   | 8   | -   | -   | 10  | -   |
| FB1        | -   | 4   | 6   | -   | -   | -   | -   | 10  |
| MP2        | 9   | -   | -   | -   | -   | 3   | 5   | -   |
| MB2        | -   | 9   | -   | -   | 1   | -   | -   | 7   |
| FP2        | -   | -   | 9   | -   | 2   | -   | -   | 8   |
| FB2        | -   | -   | -   | 9   | -   | 4   | 6   | -   |
| $\tau$     | 11  | 11  | 11  | 11  | 12  | 12  | 12  | 12  |
| $\epsilon$ | 13  | 13  | 13  | 13  | 13  | 13  | 13  | 13  |

### MuCID8

|            | MP1 | MB1 | FP1 | FB1 | XX  | MP8 | MB8 | FP8 | FB8 |
|------------|-----|-----|-----|-----|-----|-----|-----|-----|-----|
| MP1        | -   | 3   | 5   | -   | ... | 16  | -   | -   | -   |
| MB1        | 1   | -   | -   | 7   | ... | -   | 16  | -   | -   |
| FP1        | 2   | -   | -   | 8   | ... | -   | -   | 16  | -   |
| FB1        | -   | 4   | 6   | -   | ... | -   | -   | -   | 16  |
| XX         | ... | ... | ... | ... | ... | ... | ... | ... | ... |
| MP8        | 9   | -   | -   | -   | ... | -   | 3   | 5   | -   |
| MB8        | -   | 9   | -   | -   | ... | 1   | -   | -   | 7   |
| FP8        | -   | -   | 9   | -   | ... | 2   | -   | -   | 8   |
| FB8        | -   | -   | -   | 9   | ... | -   | 4   | 6   | -   |
| $\tau$     | 17  | 17  | 17  | 17  | ... | 24  | 24  | 24  | 24  |
| $\epsilon$ | 25  | 25  | 25  | 25  | ... | 25  | 25  | 25  | 25  |

**Figure S1.** Character-dependent and character-independent diversification models for binary (top) and multistate (bottom) codings of salinity and habitat. Column names for binary models correspond to coding for salinity (M=marine, F=freshwater) and the numbers 1-4 (e.g., M1, M2, F1, F2) represent the hidden states. Models for habitat (plankton-benthos) were the same. Column names for multistate models correspond to the combined salinity+habitat states (MP=marine-plankton, MB=marine-benthos, FP=freshwater-plankton, FB=freshwater-benthos) and the numbers 1-8 next to character states represent the hidden states. Parameters denoted with  $\tau$  and  $\epsilon$  (rows) are net turnover (speciation+extinction) and extinction fraction (extinction/speciation), respectively.
